# Supplementary material for: Rapid, High-Throughput Identification of Anthrax-Causing and Emetic Bacillus cereus Group Genome Assemblies via BTyper, a Computational Tool for Virulence-Based Classification of Bacillus cereus Group Isolates by Using Nucleotide Sequencing Data
Source: PubMed Central journal article supplement (PMC5561296; doi:10.1128/aem.01096-17), 2017-08-17
Supplement: AEM.01096-17_zam999118007s1.pdf [file AEM.01096-17_zam999118007s1.pdf]

**Supplemental Table S1.** Amino acid sequences of *B. cereus* group virulence genes used for virulence typing.

| <b>Amino Acid Sequence</b> | <b>NCBI Accession Number</b> | <b>Description</b>                                                                                |
|----------------------------|------------------------------|---------------------------------------------------------------------------------------------------|
| AtxA                       | 10956365                     | Anthrax toxin regulator, pXO1-118 (plasmid) [ <i>Bacillus anthracis</i> ]                         |
| BceT                       | 1665720                      | Diarrheal toxin [ <i>Bacillus cereus</i> ]                                                        |
| CapA                       | 10956446                     | Poly- $\gamma$ -D-glutamate capsule biosynthesis, pXO2-56 (plasmid) [ <i>Bacillus anthracis</i> ] |
| CapB                       | 10956448                     | Poly- $\gamma$ -D-glutamate capsule biosynthesis, pXO2-58 (plasmid) [ <i>Bacillus anthracis</i> ] |
| CapC                       | 10956447                     | Poly- $\gamma$ -D-glutamate capsule biosynthesis, pXO2-57 (plasmid) [ <i>Bacillus anthracis</i> ] |
| CapD                       | 753753473                    | Capsule biosynthesis protein CapD (plasmid) [ <i>Bacillus anthracis</i> ]                         |
| CapE                       | 821583427                    | Polyglutamate capsule biosynthesis protein CapE [ <i>Bacillus anthracis</i> ]                     |
| CerA                       | 505581110                    | Cereolysin A [ <i>Bacillus cereus</i> ]                                                           |
| CerB                       | 505581118                    | Cereolysin B [ <i>Bacillus cereus</i> ]                                                           |
| CesA                       | 190015727                    | Cereulide synthetase A, CesA (plasmid) [ <i>Bacillus cereus</i> ]                                 |
| CesB                       | 190015609                    | Cereulide synthetase B, CesB (plasmid) [ <i>Bacillus cereus</i> ]                                 |
| CesC                       | 190015504                    | ABC transporter ATP-binding protein, CesC (plasmid) [ <i>Bacillus cereus</i> ]                    |
| CesD                       | 190015506                    | Putative permease, CesD (plasmid) [ <i>Bacillus cereus</i> ]                                      |
| Clo                        | 62550724                     | Cereolysin O [ <i>Bacillus cereus</i> ]                                                           |
| Cya                        | 10956369                     | Anthrax toxin edema factor, pXO1-122 (plasmid) [ <i>Bacillus anthracis</i> ]                      |
| CytK1                      | 114152686                    | Cytotoxin K1 [ <i>Bacillus cytotoxicus</i> ]                                                      |
| CytK2                      | 30019265                     | Cytotoxin K2 [ <i>Bacillus cereus</i> ATCC 14579]                                                 |
| EntA                       | 30023271                     | Enterotoxin / cell-wall binding protein [ <i>Bacillus cereus</i> ATCC 14579]                      |
| EntFM                      | 30020092                     | Enterotoxin [ <i>Bacillus cereus</i> ATCC 14579]                                                  |
| HasA                       | 10956340                     | Hyaluronic acid capsule, pXO1-93 (plasmid) [ <i>Bacillus anthracis</i> ]                          |
| HblA                       | 30021214                     | Hemolysin BL binding component precursor [ <i>Bacillus cereus</i> ATCC 14579]                     |
| HblB                       | 30021213                     | Hemolysin BL binding component precursor [ <i>Bacillus cereus</i> ATCC 14579]                     |
| HblC                       | 30021216                     | Hemolysin BL lytic component L2 [ <i>Bacillus cereus</i> ATCC 14579]                              |
| HblD                       | 30021215                     | Hemolysin BL lytic component L1 [ <i>Bacillus cereus</i> ATCC 14579]                              |
| HlyII                      | 30021625                     | Hemolysin II [ <i>Bacillus cereus</i> ATCC 14579]                                                 |
| HlyR                       | 31322346                     | Hemolysin II regulatory protein [ <i>Bacillus cereus</i> ]                                        |
| InhA1                      | 30019435                     | Immune inhibitor A precursor [ <i>Bacillus cereus</i> ATCC 14579]                                 |
| InhA2                      | 30018848                     | Immune inhibitor A precursor [ <i>Bacillus cereus</i> ATCC 14579]                                 |
| Lef                        | 10956354                     | Anthrax toxin lethal factor, pXO1-107 (plasmid) [ <i>Bacillus anthracis</i> ]                     |
| NheA                       | 30019951                     | Non-hemolytic enterotoxin lytic component L2 [ <i>Bacillus cereus</i> ATCC 14579]                 |
| NheB                       | 30019952                     | Non-hemolytic enterotoxin lytic component L1 [ <i>Bacillus cereus</i> ATCC 14579]                 |
| NheC                       | 30019953                     | Enterotoxin C [ <i>Bacillus cereus</i> ATCC 14579]                                                |
| PagA                       | 4894326                      | Anthrax toxin protective antigen, pXO1-110 (plasmid) [ <i>Bacillus anthracis</i> ]                |
| PlcA                       | 30021854                     | 1-phosphatidylinositol phosphodiesterase precursor [ <i>Bacillus cereus</i> ATCC 14579]           |
| PlcB                       | 30018852                     | Phospholipase C [ <i>Bacillus cereus</i> ATCC 14579]                                              |

---

PlcR 358355901 PlcR [*Bacillus cereus* NC7401]

---

**Supplemental Table S2.** *B. cereus* group genomes used for *panC* database construction.

| NCBI Accession Number | Isolate                                                  | <i>panC</i> Clade |
|-----------------------|----------------------------------------------------------|-------------------|
| NZ_CP007618.1         | <i>B. anthracis</i> 2000031021                           | 3                 |
| NZ_CP009902.1         | <i>B. anthracis</i> 2002013094                           | 3                 |
| NZ_CP001974.1         | <i>B. anthracis</i> A16R                                 | 3                 |
| NZ_AAAC02000001.1     | <i>B. anthracis</i> A2012                                | 3                 |
| NC_007530.2           | <i>B. anthracis</i> Ames Ancestor                        | 3                 |
| NC_012472.1           | <i>B. cereus</i> 03BB102                                 | 3                 |
| NZ_CP009941.1         | <i>B. cereus</i> 03BB87                                  | 3                 |
| NZ_CM000717.1         | <i>B. cereus</i> 172560W                                 | 4                 |
| NC_011658.1           | <i>B. cereus</i> AH187                                   | 3                 |
| NC_011773.1           | <i>B. cereus</i> AH820                                   | 3                 |
| NZ_CM000715.1         | <i>B. cereus</i> ATCC 10876                              | 4                 |
| NC_003909.8           | <i>B. cereus</i> ATCC 10987                              | 3                 |
| NC_004722.1           | <i>B. cereus</i> ATCC 14579                              | 4                 |
| NZ_CM000721.1         | <i>B. cereus</i> ATCC 4342                               | 3                 |
| NC_011725.1           | <i>B. cereus</i> B4264                                   | 4                 |
| NC_014335.1           | <i>B. cereus</i> biovar anthracis CI                     | 3                 |
| NC_006274.1           | <i>B. cereus</i> E33L                                    | 3                 |
| NZ_CM001787.1         | <i>B. cereus</i> F                                       | 3                 |
| NZ_CM000736.1         | <i>B. cereus</i> F65185                                  | 4                 |
| NZ_CP008712.1         | <i>B. cereus</i> FT9                                     | 3                 |
| NZ_CM000714.1         | <i>B. cereus</i> m1293                                   | 3                 |
| NC_011969.1           | <i>B. cereus</i> Q1                                      | 3                 |
| NZ_ACMH00000000.1     | <i>B. cereus</i> Rock1-15                                | 4                 |
| NZ_CM000732.1         | <i>B. cereus</i> Rock3-42                                | 3                 |
| NZ_CM000734.1         | <i>B. cereus</i> Rock4-2                                 | 4                 |
| NC_009674.1           | <i>B. cytotoxicus</i> NVH 391-98                         | 7                 |
| NZ_CM000745.1         | <i>B. pseudomycooides</i> DSM 12442                      | 1                 |
| NC_008600.1           | <i>B. thuringiensis</i> Al Hakam                         | 3                 |
| NZ_CM000754.1         | <i>B. thuringiensis</i> serovar andalousiensis BGSC 4AW1 | 3                 |
| NC_017200.1           | <i>B. thuringiensis</i> serovar finitimus YBT-020        | 3                 |
| NZ_CP004870.1         | <i>B. thuringiensis</i> serovar galleriae HD-1           | 4                 |
| NZ_CM000756.1         | <i>B. thuringiensis</i> serovar huazhongensis BGSC 4BD1  | 4                 |
| NZ_CP004858.1         | <i>B. thuringiensis</i> serovar konkukian YBT-1520       | 4                 |
| NC_005957.1           | <i>B. thuringiensis</i> serovar kurstaki 97-27           | 3                 |
| NZ_CP010089.1         | <i>B. thuringiensis</i> serovar kurstaki HD-29           | 4                 |
| NZ_CM000751.1         | <i>B. thuringiensis</i> serovar kurstaki T03a001         | 4                 |
| NZ_CM000752.1         | <i>B. thuringiensis</i> serovar monterrey BGSC 4AJ1      | 3                 |

---

|                |                                                           |   |
|----------------|-----------------------------------------------------------|---|
| NZ_CM000750.1  | <i>B. thuringiensis</i> serovar pakistani T13001          | 4 |
| NZ_CM000755.1  | <i>B. thuringiensis</i> serovar pondicheriensis BGSC 4BA1 | 3 |
| NZ_CM000757.1  | <i>B. thuringiensis</i> serovar pulsiensis BGSC 4CC1      | 3 |
| NZ_CM000746.1  | <i>B. thuringiensis</i> serovar tochiensis BGSC 4Y1       | 3 |
| NC_022781.1    | <i>B. toyonensis</i> BCT-7112                             | 5 |
| LOBC00000000.1 | <i>B. wiedmannii</i> FSL W8-0169                          | 2 |
| NC_010184.1    | <i>B. weihenstephanensis</i> KBAB4                        | 6 |
| NZ_CP009746.1  | <i>B. weihenstephanensis</i> WSBC 10204                   | 6 |

---

**Supplemental Table S3.** *B. cereus* group genomes used for 16S rDNA database construction.

| NCBI Accession Number | Isolate                                             |
|-----------------------|-----------------------------------------------------|
| NZ_CP007666.1         | <i>B. anthraxis</i> str. Vollum                     |
| NC_004722.1           | <i>B. cereus</i> ATCC 14579                         |
| NC_009674.1           | <i>B. cytotoxicus</i> NVH 391-98                    |
| NZ_CM000742.1         | <i>B. mycoides</i> DSM 2048                         |
| NZ_CM000745.1         | <i>B. pseudomycooides</i> DSM 12442                 |
| NZ_CM000753.1         | <i>B. thuringiensis</i> serovar Berliner ATCC 10792 |
| CP006863.1            | <i>B. toyonensis</i> BCT-7112                       |
| LOBC00000000.1        | <i>B. wiedmannii</i> FSL W8-0169                    |
| NZ_CP009746.1         | <i>B. weihenstephanensis</i> str. WSBC 102014       |

**Supplemental Table S4.** *B. cereus* group isolate genomes in the training set (n = 22)

| <b>Isolate ID</b> | <b>SRA Accession</b> | <b><i>rpoB</i> AT</b> | <b>MLST<br/>ST</b> | <b>Phylogenetic<br/>Clade</b> |
|-------------------|----------------------|-----------------------|--------------------|-------------------------------|
| FSL H7-0926       | SRR2541537           | 90                    | 667                | 6                             |
| FSL H8-0482       | SRR2541601           | 129                   | 223                | 5                             |
| FSL H8-0488       | SRR2541602           | 129                   | 111                | 5                             |
| FSL K6-0040       | SRR2541603           | 362                   | 1101               | 4                             |
| FSL K6-0043       | SRR2541604           | 363                   | 1087               | 4                             |
| FSL K6-0067       | SRR2541605           | 365                   | 1086               | 3                             |
| FSL K6-0069       | SRR2541606           | 194                   | 1080               | 2                             |
| FSL K6-0073       | SRR2541607           | 366                   | 33                 | 4                             |
| FSL K6-0267       | SRR2541613           | 90                    | 1090               | 6                             |
| FSL M8-0117       | SRR2541639           | 308                   | 1085               | 3                             |
| FSL W8-0003       | SRR2541640           | 125                   | 1084               | 3                             |
| FSL W8-0050       | SRR2541641           | 380                   | 32                 | 3                             |
| FSL W8-0169       | SRR2541651           | 61                    | 1081               | 2                             |
| FSL W8-0268       | SRR2541662           | 92                    | 1083               | 4                             |
| FSL W8-0275       | SRR2541668           | 463                   | 1050               | 3                             |
| FSL W8-0483       | SRR2541674           | 120                   | 1082               | 3                             |
| FSL W8-0520       | SRR2541680           | 481                   | 1032               | 3                             |
| FSL W8-0523       | SRR2541686           | 481                   | 1032               | 3                             |
| FSL W8-0640       | SRR2541688           | 154                   | 1089               | 4                             |
| FSL W8-0824       | SRR2541693           | 92                    | 24                 | 4                             |
| FSL W8-0932       | SRR2541715           | 120                   | 365                | 3                             |
| FSL W8-0767       | SRR2541718           | 154                   | 787                | 4                             |

**Supplemental Table S5.** Primers used in this study

| Primer Name | Primer sequence (5' to 3') | Annealing Temperature (°C) | Reference |
|-------------|----------------------------|----------------------------|-----------|
| FHbIC       | CCTATCAATACTCTCGCAA        | 45                         | 1         |
| RHbIC       | TTTCCTTTGTTATACGCTGC       | 45                         | 1         |
| FHbID       | GAAACAGGGTCTCATATTCT       | 45                         | 1         |
| RHbID2      | CTGCATCTTTATGAATATCA       | 45                         | 1         |
| FHbIA       | GCAAAATCTATGAATGCCTA       | 45                         | 1         |
| RHbIA       | GCATCTGTTCGTAATGTTTT       | 45                         | 1         |
| F2NheA      | TAAGGAGGGGCAAACAGAAG       | 52                         | 1         |
| RNheA       | TGAATGCGAAGAGCTGCTTC       | 52                         | 1         |
| F2NheB      | CAAGCTCCAGTTCATGCGG        | 52                         | 1         |
| RNheB       | GATCCCATTTGTGTACCATTG      | 52                         | 1         |
| FNheC       | ACATCCTTTTGCAGCAGAAC       | 52                         | 1         |
| R2NheC      | CCACCAGCAATGACCATATC       | 52                         | 1         |
| FCytK       | CGACGTCACAAGTTGTAACA       | 52                         | 1         |
| R2CytK      | CGTGTGTAAATACCCAGTT        | 52                         | 1         |
| FEntFM      | GTTTCGTTCAAGGTGCTGGTAC     | 56                         | 1         |
| REntFM      | AGCTGGGCCTGTACGTACTION     | 56                         | 1         |
| gmkF        | ATTTAAGTGAGGAAGGGTAGG      | 56                         | 2         |
| gmkR        | GCAATGTTCACCAACCACAA       | 56                         | 2         |
| ptaF        | GCAGAGCGTTTAGCAAAAAGAA     | 56                         | 2         |
| ptaR        | TGCAATGCGAGTTGCTTCTA       | 56                         | 2         |
| purF        | CTGCTGCGAAAATCACAAA        | 56                         | 2         |
| purR        | CTCACGATTCGCTGCAATAA       | 56                         | 2         |
| pycAF       | GCGTTAGGTGGAAACGAAAG       | 57                         | 2         |
| pycAR       | CGCGTCCAAGTTTATGGAAT       | 57                         | 2         |
| ilvDF       | CGGGGCAAACATTAAGAGAA       | 58                         | 2         |
| ilvDR       | GGTTCTGGTCGTTTCCATTC       | 58                         | 2         |
| tpiF        | GCCCAGTAGCACTTAGCGAC       | 58                         | 2         |
| tpiR        | CCGAAACCGTCAAGAATGAT       | 58                         | 2         |
| glpF        | GCGTTTGTGCTGGTGTAAGT       | 59                         | 2         |
| glpR        | CTGCAATCGGAAGGAAGAAG       | 59                         | 2         |

**REFERENCES**

1. Ngamwongsatit P, Buasri W, Pianariyanon P, Pulsrikarn C, Ohba M, Assavanig A, Panbangred W. 2008. Broad distribution of enterotoxin genes (*hblCDA*, *nheABC*, *cytK*, and *entFM*) among *Bacillus thuringiensis* and *Bacillus cereus* as shown by novel primers. *Int J Food Microbiol* 121:352-356.
2. Jolley K. 2016. *Bacillus cereus* Multi Locus Sequence Typing. <http://pubmlst.org/bcereus/>. Accessed 07-06-2016.

**Supplemental Table S6.** *B. cereus* group genomes in the validation set (n = 24)

| <b>Isolate ID</b> | <b>SRA Accession</b> | <b><i>rpoB</i> AT</b> | <b>MLST ST</b> | <b>Phylogenetic clade</b> |
|-------------------|----------------------|-----------------------|----------------|---------------------------|
| FSL H7-0344       | SRR5185037           | 59                    | 1097           | 2                         |
| FSL H7-0683       |                      | 75                    | 222            | 6                         |
| FSL H8-0485       | SRR5189059           | 132                   | 1142           | 6                         |
| FSL H8-0492       | SRR4661790           | 134                   | 1098           | 6                         |
| FSL H8-0534       | SRR4661789           | 148                   | 83             | 1                         |
| FSL J3-0113       | SRR3458443           | 417                   | 1094           | 2                         |
| FSL J3-0123       | SRR5189058           | 513                   | 1095           | 6                         |
| FSL K6-0042       | SRR5185033           | 128                   | 87             | 1                         |
| FSL K6-0268       | SRR5185034           | 409                   | 230            | 4                         |
| FSL M7-0109       | SRR5189057           | 273                   | 410            | 6                         |
| FSL M7-0669       | SRR5189065           | 3                     | 655            | 6                         |
| FSL M7-1219       | SRR5189064           | 97                    | 1092           | 6                         |
| FSL M8-0091       | SRR5189063           | 410                   | 564            | 2                         |
| FSL M8-0139       | SRR5185026           | 424                   | 138            | 4                         |
| FSL M8-0214       | SRR5185025           | 412                   | 223            | 5                         |
| FSL R5-0184       | SRR5185020           | 277                   | 927            | 4                         |
| FSL R5-0585       | SRR5185019           | 278                   | 1143           | 4                         |
| FSL R5-0594       | SRR5185018           | 246                   | 1096           | 3                         |
| FSL R5-0708       | SRR5189062           | 257                   | 1144           | 6                         |
| FSL R5-0859       | SRR5185016           | 158                   | 1099           | 4                         |
| FSL W7-1101       | SRR5185011           | 296                   | 1100           | 4                         |
| FSL W7-1108       | SRR5189056           | 342                   | 673            | 6                         |
| FSL W7-1328       | SRR5185010           | 327                   | 1093           | 3                         |
| FSL W7-1334       | SRR5185009           | 304                   | 265            | 4                         |



**Supplemental Table S7.** Virulence genes found to be significantly associated with *B. cereus* group phylogenetic clades after a Bonferroni correction. Odds ratios less than 1 correspond to a virulence gene sharing a positive association with a clade, while odds ratios greater than 1 correspond to a negative association.

| <b>Virulence Gene</b> | <b><i>panC</i> Clade</b> | <b>Odds Ratio</b>                 | <b>Corrected P-Value</b> |
|-----------------------|--------------------------|-----------------------------------|--------------------------|
| <i>atxA</i>           | 2                        | Infinity; not detected in clade 2 | 0.027383147              |
| <i>atxA</i>           | 3                        | 0; detected only in clade 3       | 5.66E-50                 |
| <i>atxA</i>           | 4                        | Infinity; not detected in clade 4 | 1.35E-22                 |
| <i>atxA</i>           | 6                        | Infinity; not detected in clade 6 | 2.05E-05                 |
| <i>bceT</i>           | 3                        | 62.32240062                       | 1.05E-94                 |
| <i>bceT</i>           | 4                        | 0.064764416                       | 3.75E-41                 |
| <i>bceT</i>           | 5                        | 0.059850227                       | 1.56E-05                 |
| <i>bceT</i>           | 6                        | 0.288422556                       | 0.001282924              |
| <i>capA</i>           | 2                        | Infinity; not detected in clade 2 | 0.048303228              |
| <i>capA</i>           | 3                        | 0.032862187                       | 7.59E-35                 |
| <i>capA</i>           | 4                        | 11.75717237                       | 4.44E-13                 |
| <i>capA</i>           | 6                        | Infinity; not detected in clade 6 | 6.69E-05                 |
| <i>capB</i>           | 2                        | Infinity; not detected in clade 2 | 0.048303228              |
| <i>capB</i>           | 3                        | 0.027715506                       | 2.34E-36                 |
| <i>capB</i>           | 4                        | 14.33693639                       | 5.16E-14                 |
| <i>capB</i>           | 6                        | Infinity; not detected in clade 6 | 6.69E-05                 |
| <i>capC</i>           | 2                        | Infinity; not detected in clade 2 | 0.049836437              |
| <i>capC</i>           | 3                        | 0.032001269                       | 1.14E-35                 |
| <i>capC</i>           | 4                        | 12.01832512                       | 2.36E-13                 |
| <i>capC</i>           | 6                        | Infinity; not detected in clade 6 | 3.55E-05                 |
| <i>capD</i>           | 2                        | Infinity; not detected in clade 2 | 0.048064584              |
| <i>capD</i>           | 3                        | 0.033303227                       | 1.95E-34                 |
| <i>capD</i>           | 4                        | 11.62775955                       | 8.25E-13                 |
| <i>capD</i>           | 6                        | Infinity; not detected in clade 6 | 6.45E-05                 |
| <i>capE</i>           | 2                        | Infinity; not detected in clade 2 | 0.048064584              |
| <i>capE</i>           | 3                        | 0.028086371                       | 6.11E-36                 |
| <i>capE</i>           | 4                        | 14.17992651                       | 5.13E-14                 |
| <i>capE</i>           | 6                        | Infinity; not detected in clade 6 | 6.45E-05                 |
| <i>cesA</i>           | 4                        | Infinity; not detected in clade 4 | 0.039756874              |
| <i>cesB</i>           | 4                        | Infinity; not detected in clade 4 | 0.039756874              |
| <i>cesC</i>           | 6                        | 0.140395167                       | 7.65E-06                 |
| <i>cesD</i>           | 4                        | Infinity; not detected in clade 4 | 0.039756874              |

---

|              |   |                                    |             |
|--------------|---|------------------------------------|-------------|
| <i>cya</i>   | 2 | Infinity; not detected in clade 2  | 0.049836437 |
| <i>cya</i>   | 3 | 0; only detected in clade 3        | 1.34E-48    |
| <i>cya</i>   | 4 | Infinity; not detected in clade 4  | 5.68E-22    |
| <i>cya</i>   | 6 | Infinity; not detected in clade 6  | 3.55E-05    |
| <i>cytK2</i> | 3 | 3.344035241                        | 1.61E-11    |
| <i>cytK2</i> | 4 | 0.029196618                        | 7.28E-63    |
| <i>cytK2</i> | 5 | 10.87410105                        | 0.001947151 |
| <i>cytK2</i> | 6 | Infinity; not detected in clade 6  | 4.51E-15    |
| <i>hasA</i>  | 2 | Infinity; not detected in clade 2  | 0.027803859 |
| <i>hasA</i>  | 3 | 0.00404891                         | 4.12E-47    |
| <i>hasA</i>  | 4 | Infinity; not detected in clade 4  | 2.61E-22    |
| <i>hasA</i>  | 6 | 18.54781063                        | 0.000666843 |
| <i>hblA</i>  | 2 | 0.195842768                        | 0.01513785  |
| <i>hblA</i>  | 3 | 196.0842149                        | 6.23E-118   |
| <i>hblA</i>  | 4 | 0.017511067                        | 2.77E-49    |
| <i>hblA</i>  | 5 | 0; detected in all clade 5 genomes | 4.40E-06    |
| <i>hblA</i>  | 6 | 0; detected in all clade 6 genomes | 1.85E-15    |
| <i>hblB</i>  | 2 | 0.195842768                        | 0.01513785  |
| <i>hblB</i>  | 3 | 196.0842149                        | 6.23E-118   |
| <i>hblB</i>  | 4 | 0.017511067                        | 2.77E-49    |
| <i>hblB</i>  | 5 | 0; detected in all clade 5 genomes | 4.40E-06    |
| <i>hblB</i>  | 6 | 0; detected in all clade 6 genomes | 1.85E-15    |
| <i>hblC</i>  | 2 | 0.18955875                         | 0.013355882 |
| <i>hblC</i>  | 3 | 128.5727561                        | 1.66E-111   |
| <i>hblC</i>  | 4 | 0.03188879                         | 1.76E-44    |
| <i>hblC</i>  | 5 | 0; detected in all clade 5 genomes | 3.28E-06    |
| <i>hblC</i>  | 6 | 0; detected in all clade 6 genomes | 1.03E-15    |
| <i>hblD</i>  | 2 | 0.192045241                        | 0.013842561 |
| <i>hblD</i>  | 3 | 149.0820037                        | 7.84E-114   |
| <i>hblD</i>  | 4 | 0.024545946                        | 6.83E-47    |
| <i>hblD</i>  | 5 | 0; detected in all clade 5 genomes | 3.65E-06    |
| <i>hblD</i>  | 6 | 0; detected in all clade 6 genomes | 1.21E-15    |
| <i>hlyII</i> | 3 | 0.155082814                        | 3.04E-27    |
| <i>hlyII</i> | 5 | Infinity; not detected in clade 5  | 7.76E-07    |
| <i>hlyII</i> | 6 | Infinity; not detected in clade 6  | 2.44E-17    |
| <i>hlyR</i>  | 3 | 0.252140052                        | 1.97E-15    |
| <i>hlyR</i>  | 5 | Infinity; not detected in clade 5  | 1.91E-08    |
| <i>hlyR</i>  | 6 | 15.54490788                        | 3.58E-13    |
| <i>lef</i>   | 2 | Infinity; not detected in clade 2  | 0.048890931 |
| <i>lef</i>   | 3 | 0; detected only in clade 3        | 3.83E-48    |

---

---

|             |   |                                   |             |
|-------------|---|-----------------------------------|-------------|
| <i>lef</i>  | 4 | Infinity; not detected in clade 4 | 1.10E-21    |
| <i>lef</i>  | 6 | Infinity; not detected in clade 6 | 3.65E-05    |
| <i>pagA</i> | 2 | Infinity; not detected in clade 2 | 0.048303228 |
| <i>pagA</i> | 3 | 0; detected only in clade 3       | 1.09E-47    |
| <i>pagA</i> | 4 | Infinity; not detected in clade 4 | 2.39E-21    |
| <i>pagA</i> | 6 | Infinity; not detected in clade 6 | 6.69E-05    |

---
